# Supplementary material for: ACE-I/D Allele Modulates Improvements of Cardiorespiratory Function and Muscle Performance with Interval-Type Exercise
Source: MDPI journal article supplement (doi:10.3390/genes14051100), 2023-05-17

**Figure S1: Cardiac function *before and after interval training between ACE-I/D genotypes.*** Bar graph of the mean  $\pm$  SD of normalized values before and after 8-weeks of interval-type training for parameters characterizing cardiac function during incremental ramp exercise. Note the consistent differences in values for cardiac parameters between carriers and non-carriers of the ACE I-allele, which tendency was inversed when values were related to work. +,  $p<0.10$ ; \*, \*\*  $p<0.05$  and 0.01.

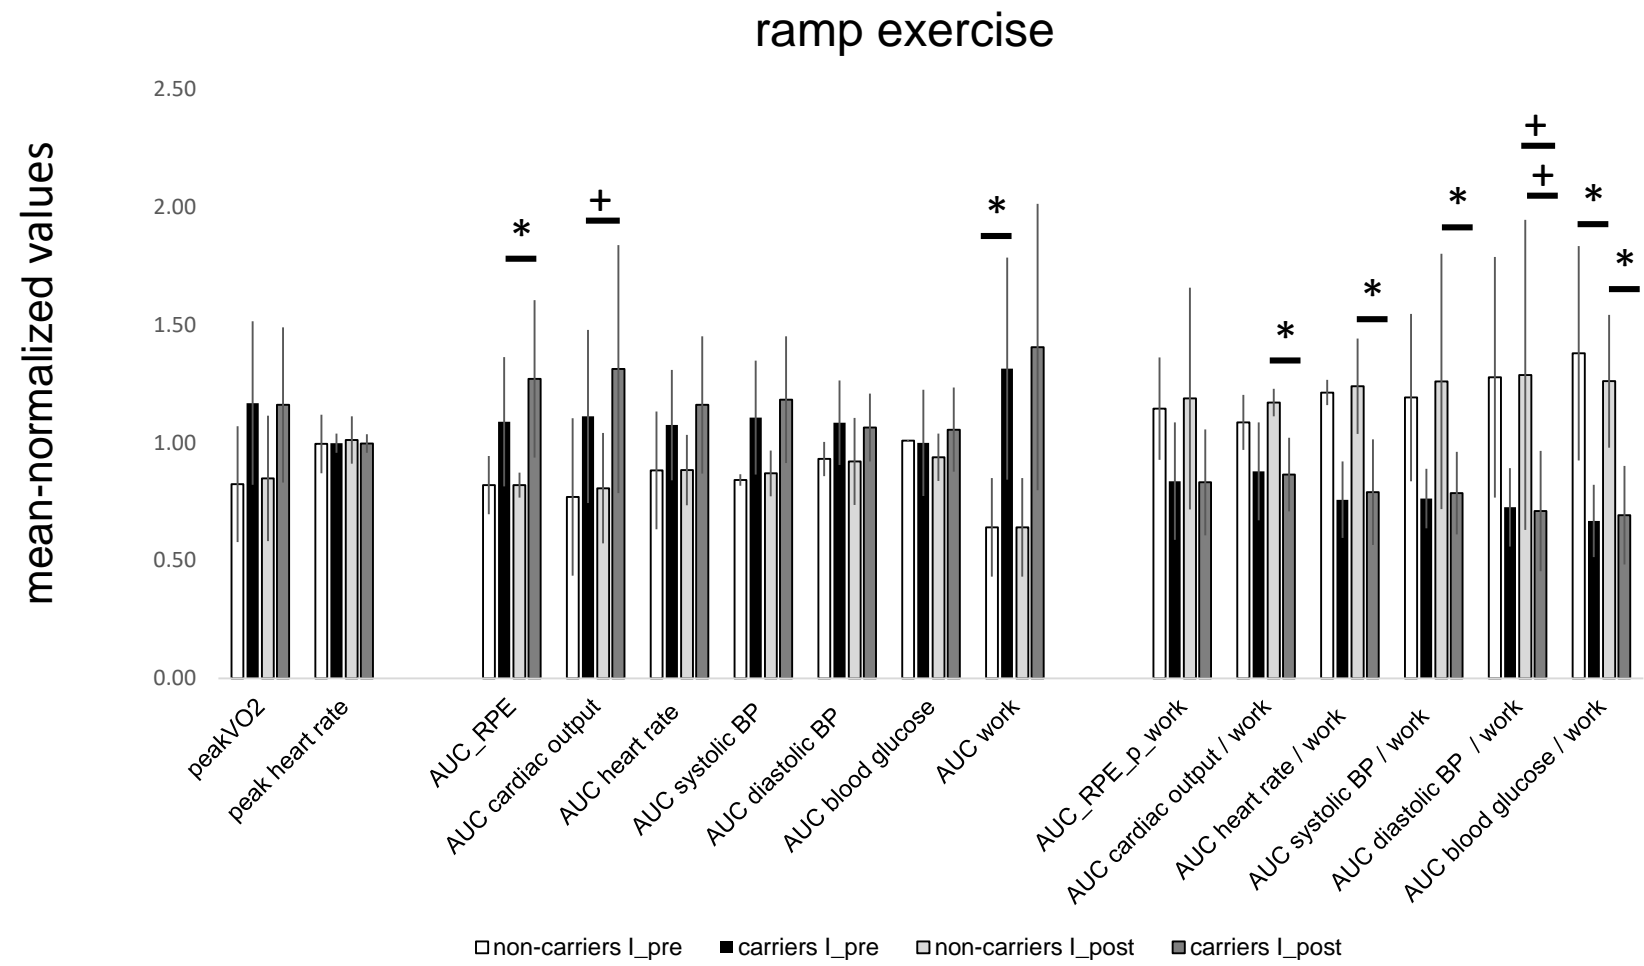

**Figure S2: Post exercise recovery of cardiac function before and after interval training between ACE-I/D genotypes.** Bar graph of the mean  $\pm$  SD of normalized values before and after 8-weeks of interval-type training for parameters of cardiac function during recovery from ramp incremental exercise. Note the anti-dromic genotype- and training-dependence of systolic and diastolic blood pressure whereas glucose and heart rate was only affected by the ACE I-allele. +,  $p<0.10$ ; \*, \*\*  $p<0.05$  and  $0.01$ .

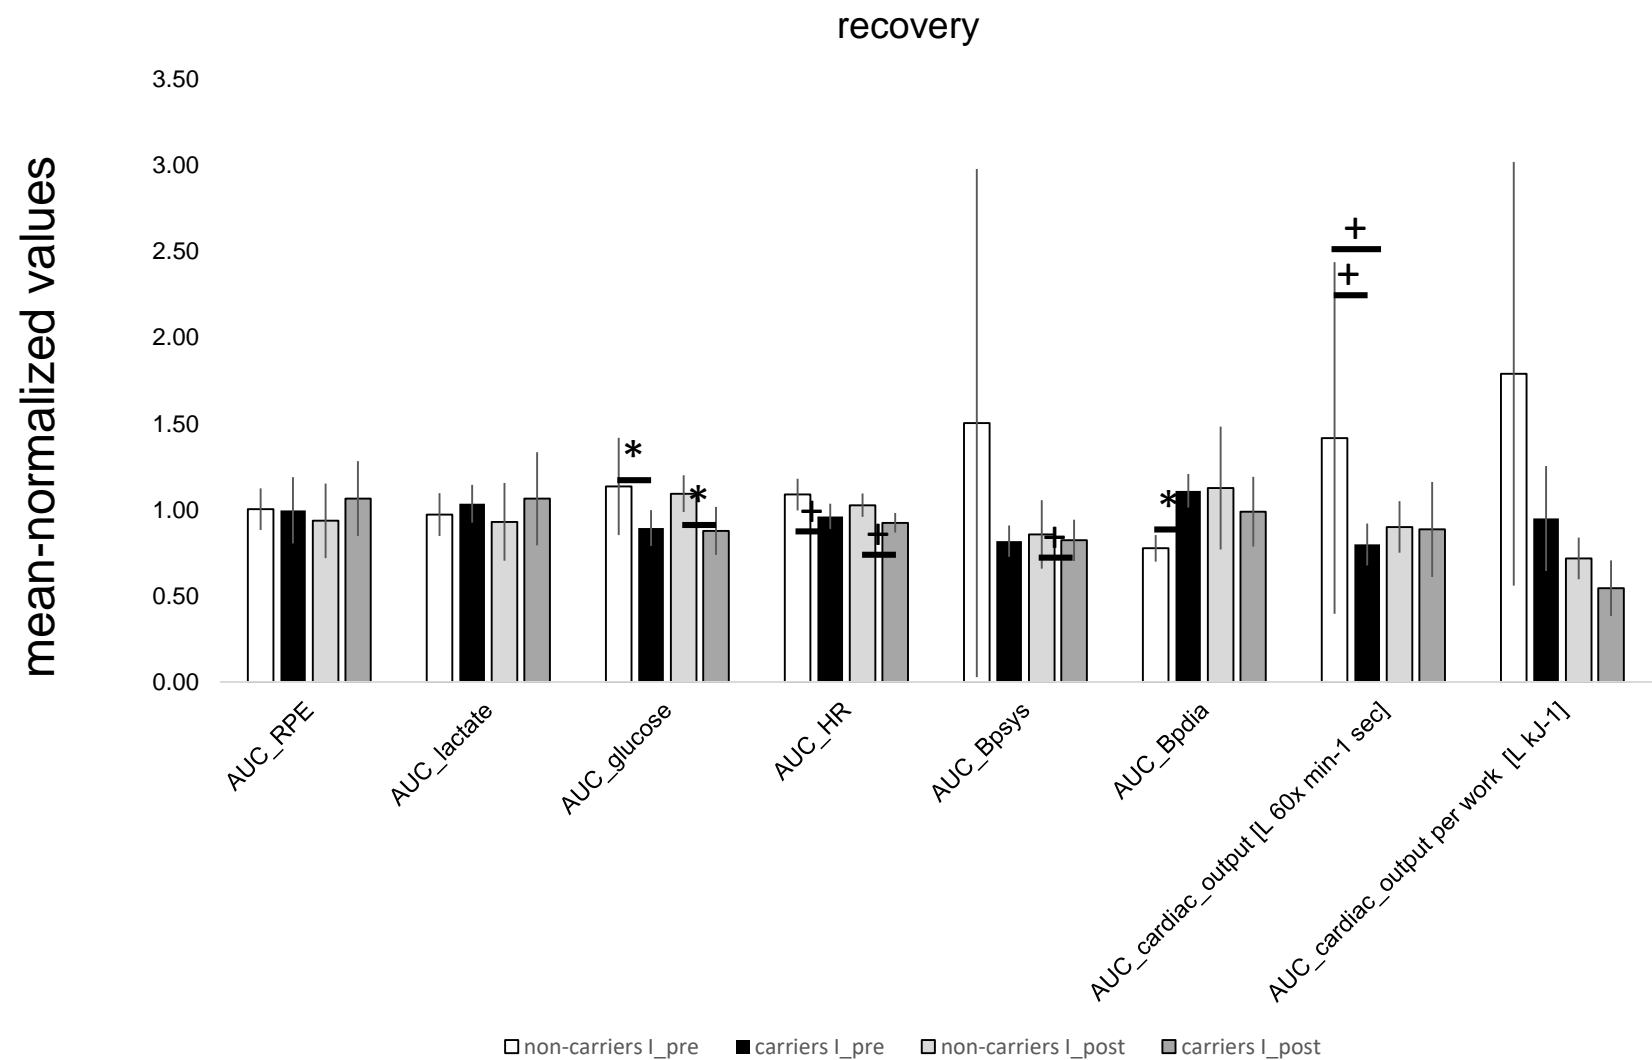

**Figure S3:** Post exercise recovery of muscle metabolism before and after interval training between ACE-I/D genotypes. Bar graph of the mean  $\pm$  SD of normalized values before and after 8-weeks of interval-type training for parameters of perfusion-related muscle metabolism during recovery from ramp incremental exercise. +,  $p<0.10$ ; \*, \*\*  $p<0.05$  and  $0.01$ .

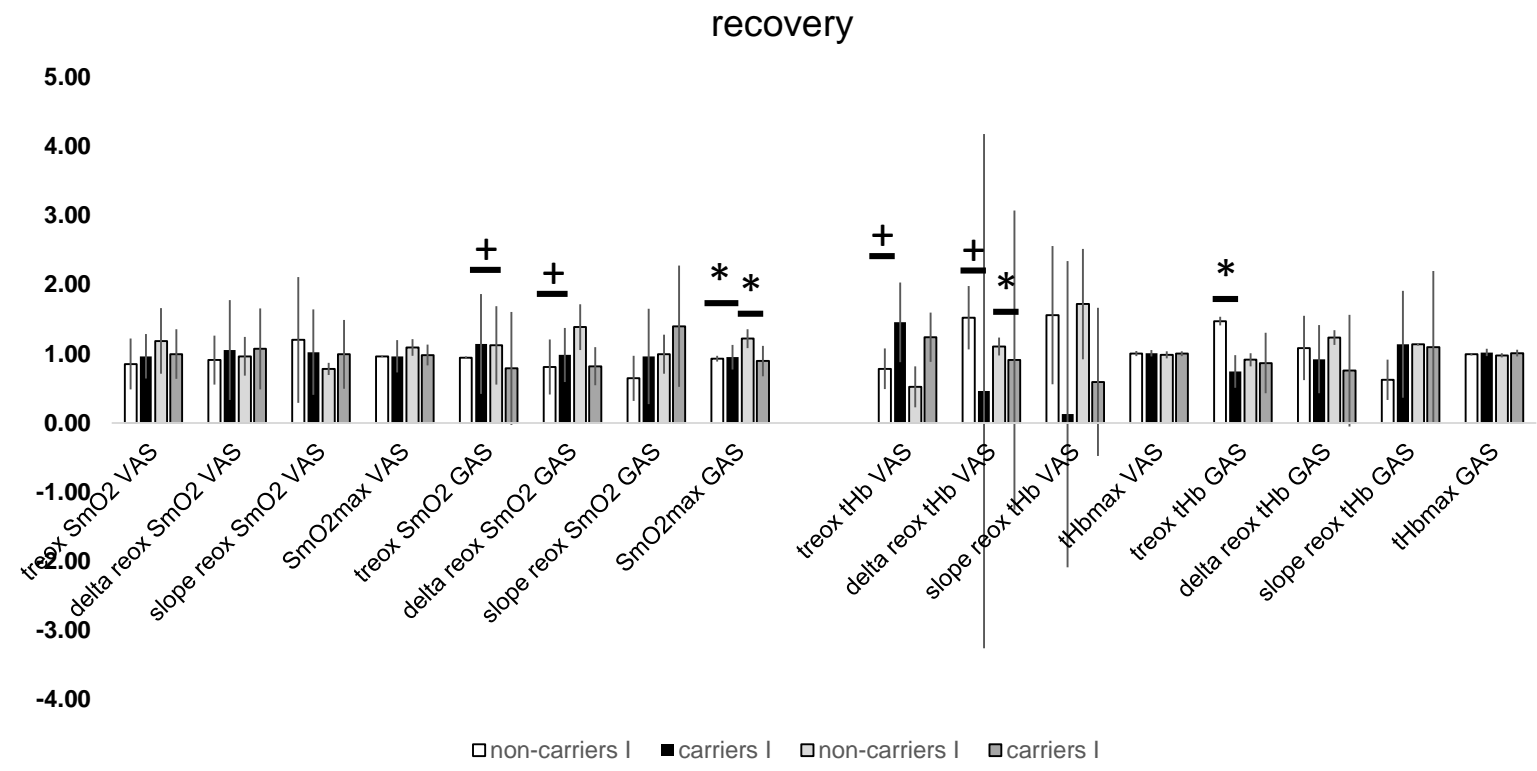

Supplement: s1 [file s1]
