# Supplementary material for: ACE-I/D Allele Modulates Improvements of Cardiorespiratory Function and Muscle Performance with Interval-Type Exercise
Source: MDPI journal article supplement (doi:10.3390/genes14051100), 2023-05-17
Supplement: s1 [file s1]

**Table S1:** Mechanical demand of the training stimulus. Mean  $\pm$  SE of percentage differences in mechanical characteristics of interval exercise between the last and the first exercise session, and the corresponding p-values. Values represent (repeated-measures ANOVA). Bold underlined values were deemed to reflect significant differences at a level of 5%.

|                                   | <i><math>\Delta</math> post vs pre training [%]</i> |                         |
|-----------------------------------|-----------------------------------------------------|-------------------------|
|                                   | <i>mean <math>\pm</math> SD</i>                     | <i>p-value</i>          |
| <i>number of sets</i>             | +56.2 $\pm$ 13.0                                    | <b><u>&lt;0.001</u></b> |
| <i>target power [W]</i>           | +87.1 $\pm$ 15.8                                    | <b><u>&lt;0.001</u></b> |
| <i>target power/PPO [W x W-1]</i> | +87.1 $\pm$ 15.7                                    | <b><u>&lt;0.001</u></b> |
| <i>total work [kJ]</i>            | +88.5 $\pm$ 61.4                                    | <b><u>&lt;0.001</u></b> |
| <i>exercise duration [sec]</i>    | +43.5 $\pm$ 27.9                                    | <b><u>0.005</u></b>     |
| <i>average power [W]</i>          | +87.2 $\pm$ 58.4                                    | <b><u>&lt;0.001</u></b> |
| <i>negative work [J]</i>          | +66.8 $\pm$ 24.9                                    | <b><u>0.020</u></b>     |
| <i>positive work [J]</i>          | +94.6 $\pm$ 87.4                                    | <b><u>0.038</u></b>     |
| <i>% positive work [J]</i>        | +0.5 $\pm$ 13.0                                     | 0.625                   |

**Table S2:** Metabolic impact of the training stimulus. Mean  $\pm$  SE of percentage differences in metabolic characteristics of interval exercise between the last and the first exercise session, and the corresponding p-values (repeated-measures ANOVA). Bold underlined values were deemed to reflect significant differences at a level of 5%.

|                                          | <i><math>\Delta</math> post vs pre training [%]</i> |                         |
|------------------------------------------|-----------------------------------------------------|-------------------------|
|                                          | <i>mean <math>\pm</math> SD</i>                     | <i>p-value</i>          |
| <b><u>Cardiovasculature</u></b>          |                                                     |                         |
| <i>AUC cardiac output [L]</i>            | +106.2 $\pm$ 122.5                                  | <b><u>0.020</u></b>     |
| <i>AUC heart rate [beats]</i>            | +109.0 $\pm$ 162.9                                  | <b><u>&lt;0.001</u></b> |
| <i>AUC systolic BP [mmHg sec]</i>        | +51.9 $\pm$ 30.1                                    | <b><u>&lt;0.001</u></b> |
| <i>AUC diastolic BP [mmHg sec]</i>       | +52.2 $\pm$ 36.5                                    | <b><u>&lt;0.001</u></b> |
| <i>AUC blood glucose [mM sec]</i>        | +52.2 $\pm$ 27.7                                    | <b><u>&lt;0.001</u></b> |
| <b><u>skeletal muscle</u></b>            |                                                     |                         |
| <i>AUC SmO2 deficit VAS [% SmO2 sec]</i> | +72.0 $\pm$ 83.0                                    | 0.104                   |
| <i>AUC SmO2 deficit GAS [% SmO2 sec]</i> | +76.7 $\pm$ 137.1                                   | 0.352                   |
| <i>AUC tHb VAS [mg ml-1 sec]</i>         | +35.3 $\pm$ 26.1                                    | <b><u>0.009</u></b>     |
| <i>AUC tHb GAS [mg ml-1 sec]</i>         | +36.7 $\pm$ 32.8                                    | <b><u>0.033</u></b>     |
| <i>AUC blood lactate [mM sec]</i>        | +88.1 $\pm$ 203.0                                   | 0.511                   |

**Table S3:** Work-related metabolic impact of the training stimulus. Mean  $\pm$  SE of percentage differences in metabolic characteristics of interval exercise, related to the performed work, between the last and the first exercise session, and the corresponding p-values. Values represent (repeated-measured ANOVA). Bold underlined values were deemed to reflect significant differences at a level of 5%.

cardiac muscle

|                                             |                  |       |
|---------------------------------------------|------------------|-------|
| <i>AUC RPE / work [W-1]</i>                 | -14.4 $\pm$ 16.9 | 0.140 |
| <i>AUC cardiac output per work [L kJ-1]</i> | 12.6 $\pm$ 71.6  | 0.947 |
| <i>AUC heart rate/work [beats kJ-1]</i>     | 16.6 $\pm$ 99.2  | 0.818 |
| <i>AUC systolic BP/work [mmHg W-1]</i>      | -15.1 $\pm$ 20.3 | 0.098 |
| <i>AUC diastolic BP/work [mmHg W-1]</i>     | -13.7 $\pm$ 26.7 | 0.242 |
| <i>AUC glucose/work [mM W-1]</i>            | -13.7 $\pm$ 22.7 | 0.304 |

skeletal muscle

|                                               |                  |                     |
|-----------------------------------------------|------------------|---------------------|
| <i>AUC SmO2 deficit/work VAS [% SmO2 W-1]</i> | -12.5 $\pm$ 22.2 | <b><u>0.049</u></b> |
| <i>AUC SmO2 deficit/work GAS [% SmO2 W-1]</i> | -15.2 $\pm$ 45.1 | <b><u>0.032</u></b> |
| <i>AUC tHb/work VAS [mg ml-1 W-1]</i>         | -26.1 $\pm$ 19.9 | 0.147               |
| <i>AUC tHb/work GAS [mg ml-1 W-1]</i>         | -26.3 $\pm$ 21.6 | 0.129               |
| <i>AUC lactate / work [mM W-1]</i>            | -12.6 $\pm$ 62.9 | 0.074               |

**Table S4:** *ACE-I/D genotype associated training effects on muscle performance.* p-values of main effects of training x I-allele (repeated ANOVA) and post hoc effects for anaerobic and aerobic performance. Bold underlined values were considered significant.

|                   | <i>training</i>     | <i>I-allele</i> | <i>training x I-allele</i> | <i>I vs no I<br/>pre</i> | <i>I vs no I<br/>post</i> | <i>post v pre<br/>no I-allele</i> | <i>post v pre<br/>I-allele</i> |
|-------------------|---------------------|-----------------|----------------------------|--------------------------|---------------------------|-----------------------------------|--------------------------------|
| positive peak P   | <b><u>0.011</u></b> | 0.429           | 0.475                      | 0.508                    | 0.358                     | 0.173                             | 0.003                          |
| positive peak RFD | 0.079               | 0.611           | 0.625                      | 0.710                    | 0.515                     | 0.410                             | 0.030                          |
| negative peak P   | <b><u>0.011</u></b> | 0.739           | 0.168                      | 0.764                    | 0.110                     | <b><u>0.026</u></b>               | 0.083                          |
| negative peak RFD | 0.625               | 0.278           | 0.670                      | 0.349                    | 0.294                     | 0.971                             | 0.344                          |
| reactive peak P   | 0.583               | 0.347           | 0.180                      | 0.518                    | 0.224                     | 0.620                             | 0.065                          |
| reactive peak RFD | 0.499               | 0.287           | 0.083                      | 0.628                    | 0.081                     | 0.482                             | <b><u>0.023</u></b>            |
| PPO               | 0.189               | 0.127           | 0.387                      | 0.129                    | 0.128                     | 0.772                             | <b><u>0.040</u></b>            |
| body mass         | 0.907               | 0.340           | 0.313                      | 0.327                    | 0.355                     | 0.515                             | 0.339                          |

**Table S5:** ACE-I/D genotype associated training effects on cardiovascular functioning and perfusion-related muscle metabolism during ramp exercise. p-values of main effects of training x I-allele (repeated ANOVA) and post hoc effects for metabolic parameters during ramp incremental exercise. Bold underlined values were considered significant.

|                             | <i>training</i> | <i>I-allele</i>     | <i>training x I-allele</i> | <i>I vs no I<br/>pre</i> | <i>I vs no I<br/>post</i> | <i>post v pre<br/>no I-allele</i> | <i>post v pre<br/>I-allele</i> |
|-----------------------------|-----------------|---------------------|----------------------------|--------------------------|---------------------------|-----------------------------------|--------------------------------|
| VO2max                      | 0.647           | 0.250               | 0.445                      | 0.239                    | 0.265                     | 0.489                             | 0.736                          |
| PPO                         | 0.189           | 0.127               | 0.387                      | 0.129                    | 0.128                     | 0.772                             | <b><u>0.040</u></b>            |
| peak heart rate             | 0.283           | 0.903               | 0.202                      | 0.942                    | 0.732                     | 0.189                             | 0.803                          |
| peak cardiac output         | 0.334           | 0.131               | 0.541                      | 0.315                    | 0.062                     | 0.830                             | 0.118                          |
| <i>cardiovascular</i>       |                 |                     |                            |                          |                           |                                   |                                |
| AUC work                    | 0.352           | 0.132               | 0.352                      | 0.140                    | 0.140                     | 1.000                             | 0.072                          |
| AUC RPE                     | 0.120           | 0.151               | 0.120                      | 0.237                    | 0.113                     | 1.000                             | <b><u>0.007</u></b>            |
| AUC cardiac output          | 0.315           | 0.240               | 0.240*                     | 0.278                    | 0.122*                    | 0.427*                            | 0.094                          |
| AUC heart rate              | 0.422           | 0.276               | 0.444                      | 0.340                    | 0.250                     | 0.982                             | 0.121                          |
| AUC systolic BP             | 0.376           | 0.159               | 0.680                      | 0.184                    | 0.165                     | 0.779                             | 0.188                          |
| AUC diastolic BP            | 0.764           | 0.244               | 0.925                      | 0.294                    | 0.271                     | 0.907                             | 0.677                          |
| AUC glucose                 | 0.913           | 0.713               | 0.324                      | 0.958                    | 0.419                     | 0.527                             | 0.348                          |
| AUC RPE per work            | 0.768           | 0.140               | 0.707                      | 0.160                    | 0.149                     | 0.704                             | 0.930                          |
| AUC cardiac output per work | 0.463           | 0.093               | 0.379                      | 0.253                    | <b><u>0.022*</u></b>      | 0.182*                            | 0.867                          |
| AUC heart rate per work     | 0.701           | <b><u>0.048</u></b> | 0.411                      | 0.113                    | <b><u>0.025</u></b>       | 0.796                             | 0.218                          |

|                           |       |                     |                       |                     |                     |       |        |
|---------------------------|-------|---------------------|-----------------------|---------------------|---------------------|-------|--------|
| AUC systolic BP per work  | 0.921 | 0.078               | 0.209                 | 0.149               | <b><u>0.050</u></b> | 0.491 | 0.159  |
| AUC diastolic BP per work | 0.405 | 0.106               | 0.331                 | 0.181               | 0.068               | 0.931 | 0.080  |
| AUC glucose per work      | 0.096 | <b><u>0.017</u></b> | 0.541                 | <b><u>0.021</u></b> | <b><u>0.016</u></b> | 0.189 | 0.217  |
| <i>skeletal muscle</i>    |       |                     |                       |                     |                     |       |        |
| AUC tHb VAS               | 0.832 | 0.631               | 0.927                 | 0.684               | 0.774               | 0.945 | 0.747  |
| AUC tHb GAS               | 0.510 | 0.326               | 0.889                 | 0.276               | 0.460               | 0.649 | 0.578  |
| AUC tHb per work VAS      | 0.727 | 0.955               | 0.827                 | 0.885               | 0.854               | 0.941 | 0.552  |
| AUC tHb per work GAS      | 0.411 | 0.965               | 0.316                 | 0.658               | 0.752               | 0.305 | 0.834  |
| AUC SmO2 deficit VAS      | 0.547 | 0.592               | 0.085*                | 0.404               | 0.908               | 0.259 | 0.186* |
| AUC SmO2 deficit GAS      | 0.223 | 0.127               | <b><u>0.044</u></b> * | <b><u>0.045</u></b> | 0.411               | 0.102 | 0.258* |
| AUC SmO2 def per work VAS | 0.381 | 0.193               | <b><u>0.034</u></b> * | 0.662               | <b><u>0.049</u></b> | 0.123 | 0.119* |
| AUC SmO2 def per work GAS | 0.425 | 0.778               | <b><u>0.039</u></b> * | 0.512               | 0.162               | 0.142 | 0.118* |
| AUC lactate               | 0.631 | 0.215               | 0.540                 | 0.371               | 0.207               | 0.939 | 0.264  |
| AUC lactate per work      | 0.879 | 0.182               | 0.923                 | 0.141               | 0.244               | 0.887 | 0.953  |

**Table S6:** ACE-I/D genotype associated training effects on cardiovascular functioning and perfusion-related muscle metabolism during interval exercise. p-values of main effects of training x I-allele (repeated ANOVA) and post hoc effects for primarily metabolic parameters being assessed during interval-type exercise for skeletal and cardiac muscle. Bold underlined values were considered significant.

|                             | <i>training</i>         | <i>I-allele</i> | <i>training x I-allele</i> | <i>I vs no I<br/>pre</i> | <i>I vs no I<br/>post</i> | <i>post v pre<br/>no I-allele</i> | <i>post v pre<br/>I-allele</i> |
|-----------------------------|-------------------------|-----------------|----------------------------|--------------------------|---------------------------|-----------------------------------|--------------------------------|
| <i>cardiovascular</i>       |                         |                 |                            |                          |                           |                                   |                                |
| AUC cardiac output          | <b><u>0.019</u></b>     | 0.832           | 0.992                      | 0.839                    | 0.860                     | 0.130                             | <b><u>0.015</u></b>            |
| AUC RPE per work            | 0.140                   | 0.540           | 0.837                      | 0.742                    | 0.223                     | 0.437                             | 0.087                          |
| AUC cardiac output per work | 0.947                   | 0.845           | 0.430                      | 0.948                    | 0.563                     | 0.676                             | 0.369                          |
| AUC systolic BP per work    | 0.098                   | 0.588           | 0.675                      | 0.603                    | 0.634                     | 0.225                             | 0.162                          |
| AUC diastolic BP per work   | 0.282                   | 0.840           | 0.671                      | 0.956                    | 0.342                     | 0.695                             | 0.132                          |
| AUC heart rate per work     | 0.818                   | 0.964           | 0.072                      | 0.610                    | 0.288                     | 0.223                             | 0.087                          |
| AUC glucose per work        | 0.304                   | 0.391           | 0.629                      | 0.747                    | <b><u>0.026</u></b>       | 0.742                             | 0.131                          |
| AUC glucose                 | <b><u>&lt;0.001</u></b> | 0.428           | 0.939                      | 0.498                    | 0.475                     | <b><u>0.007</u></b>               | <b><u>&lt;0.001</u></b>        |
| <i>skeletal muscle</i>      |                         |                 |                            |                          |                           |                                   |                                |
| AUC tHb GAS                 | <b><u>0.033</u></b>     | 0.808           | 0.788                      | 0.911                    | 0.783                     | 0.222                             | <b><u>0.017</u></b>            |
| AUC tHb VAS                 | <b><u>0.009</u></b>     | 0.950           | 0.686                      | 0.866                    | 0.859                     | 0.056                             | <b><u>0.012</u></b>            |
| AUC SmO2 deficit GAS        | 0.352                   | 0.931           | 0.328                      | 0.378                    | 0.729                     | 0.976                             | 0.066                          |
| AUC SmO2 deficit VAS        | 0.104                   | 0.913           | 0.519                      | 0.637                    | 0.890                     | 0.522                             | <b><u>0.031</u></b>            |
| AUC lactate                 | 0.511                   | 0.513           | 0.419                      | 0.191                    | 0.959                     | 0.928                             | 0.144                          |

|                               |                       |        |                       |                       |        |                     |                     |
|-------------------------------|-----------------------|--------|-----------------------|-----------------------|--------|---------------------|---------------------|
| AUC tHb per work GAS          | 0.129                 | 0.707  | 0.548                 | 0.994                 | 0.301  | 0.541               | 0.054               |
| AUC tHb per work VAS          | 0.147                 | 0.571  | 0.338                 | 0.994                 | 0.149  | 0.731               | <b><u>0.035</u></b> |
| AUC SmO2 deficit per work GAS | <b><u>0.032</u></b> * | 0.186* | <b><u>0.019</u></b> * | <b><u>0.041</u></b> * | 0.417* | <b><u>0.030</u></b> | 0.360*              |
| AUC SmO2 deficit per work VAS | <b><u>0.049</u></b> * | 0.093* | 0.097*                | <b><u>0.039</u></b> * | 0.195* | 0.096               | 0.320*              |
| AUC lactate per work          | 0.074                 | 0.169  | 0.103                 | <b><u>0.040</u></b>   | 0.621  | 0.059               | 0.816               |

**Table S7:** ACE-I/D genotype associated training effects on the recovery of cardiovascular parameters and perfusion-related skeletal muscle metabolism. p-values of main effects of training x I-allele (repeated-measures ANOVA) and post hoc effects for skeletal muscle and cardiovascular parameters being assessed during the first 8-minutes of recovery from ramp incremental exercise. Asterisk indicates effects being tested with a one-sided research hypothesis. Bold underlined values were considered significant.

|                       | <i>training</i> | <i>I-allele</i>       | <i>training x I-allele</i> | <i>I vs no I<br/>pre</i> | <i>I vs no I<br/>post</i> | <i>post v pre<br/>no I-allele</i> | <i>post v pre<br/>I-allele</i> |
|-----------------------|-----------------|-----------------------|----------------------------|--------------------------|---------------------------|-----------------------------------|--------------------------------|
| <i>cardiovascular</i> |                 |                       |                            |                          |                           |                                   |                                |
| AUC RPE               | 1.000           | 0.701                 | 0.252                      | 0.962                    | 0.484                     | 0.502                             | 0.227                          |
| AUC cardiac output    | 0.222           | 0.194                 | 0.102                      | 0.097                    | 0.946                     | 0.111                             | 0.584                          |
| AUC heart rate        | 0.150           | <b><u>0.037</u></b>   | 0.697                      | 0.075                    | 0.063                     | 0.289                             | 0.239                          |
| AUC systolic BP       | 0.250           | 0.124                 | 0.244                      | 0.174                    | 0.758                     | 0.195                             | 0.987                          |
| AUC diastolic BP      | 0.297           | 0.354                 | 0.053                      | <b><u>0.003</u></b>      | 0.481                     | 0.091                             | 0.243                          |
| AUC glucose           | 0.478           | <b><u>0.033</u></b> * | 0.750                      | <b><u>0.037</u></b> *    | <b><u>0.044</u></b> *     | 0.560                             | 0.671                          |



*skeletal muscle*

|                    |       |                     |       |                     |                     |                     |       |
|--------------------|-------|---------------------|-------|---------------------|---------------------|---------------------|-------|
| AUC lactate        | 0.944 | 0.502               | 0.683 | 0.497               | 0.546               | 0.786               | 0.719 |
| delta tHb GAS      | 0.993 | 0.578               | 0.612 | 0.885               | 0.535               | 0.912               | 0.820 |
| delta tHb VAS      | 0.991 | 0.551               | 0.600 | 0.607               | 0.888               | 0.868               | 0.737 |
| treox tHb GAS      | 0.368 | <b><u>0.038</u></b> | 0.130 | <b><u>0.026</u></b> | 0.870               | 0.199               | 0.592 |
| treox tHb VAS      | 0.399 | <b><u>0.003</u></b> | 0.054 | 0.070               | <b><u>0.050</u></b> | 0.598               | 0.417 |
| slope tHb GAS      | 0.714 | 0.703               | 0.612 | 0.613               | 0.955               | 0.651               | 0.943 |
| slope tHb VAS      | 0.709 | 0.129               | 0.224 | 0.290               | 0.259               | 0.913               | 0.559 |
| overshoot tHb GAS  | 0.220 | 0.410               | 0.144 | 0.476               | 0.378               | 0.425               | 0.256 |
| overshoot tHb VAS  | 0.217 | 0.739               | 0.291 | 0.857               | 0.635               | 0.332               | 0.401 |
| delta SmO2 GAS     | 0.200 | 0.657               | 0.084 | 0.738               | 0.182               | 0.052               | 0.282 |
| delta SmO2 VAS     | 0.793 | 0.733               | 0.642 | 0.741               | 0.753               | 0.822               | 0.892 |
| treox SmO2 GAS     | 0.644 | 0.869               | 0.173 | 0.623               | 0.489               | 0.585               | 0.060 |
| treox SmO2 VAS     | 0.499 | 0.945               | 0.563 | 0.849               | 0.781               | 0.485               | 0.900 |
| slope SmO2 GAS     | 0.170 | 0.517               | 0.167 | 0.624               | 0.499               | 0.480               | 0.110 |
| slope SmO2 VAS     | 0.286 | 0.966               | 0.374 | 0.710               | 0.632               | 0.259               | 0.879 |
| overshoot SmO2 GAS | 0.074 | 0.322               | 0.085 | 0.901               | <b><u>0.050</u></b> | <b><u>0.016</u></b> | 0.331 |
| overshoot SmO2 VAS | 0.186 | 0.685               | 0.333 | 0.985               | 0.420               | 0.184               | 0.742 |
